# Supplementary material for: Prediction and validation of murine MHC class I epitopes of the recombinant virus VSV-GP
Source: PubMed Central journal article supplement (PMC9893851; doi:10.3389/fimmu.2022.1100730), 2023-01-19
Supplement: DataSheet_1.pdf [file DataSheet_1.pdf]

## Supplementary Material

### 1 Supplementary Figures and Tables

#### 1.1 Supplementary Figures

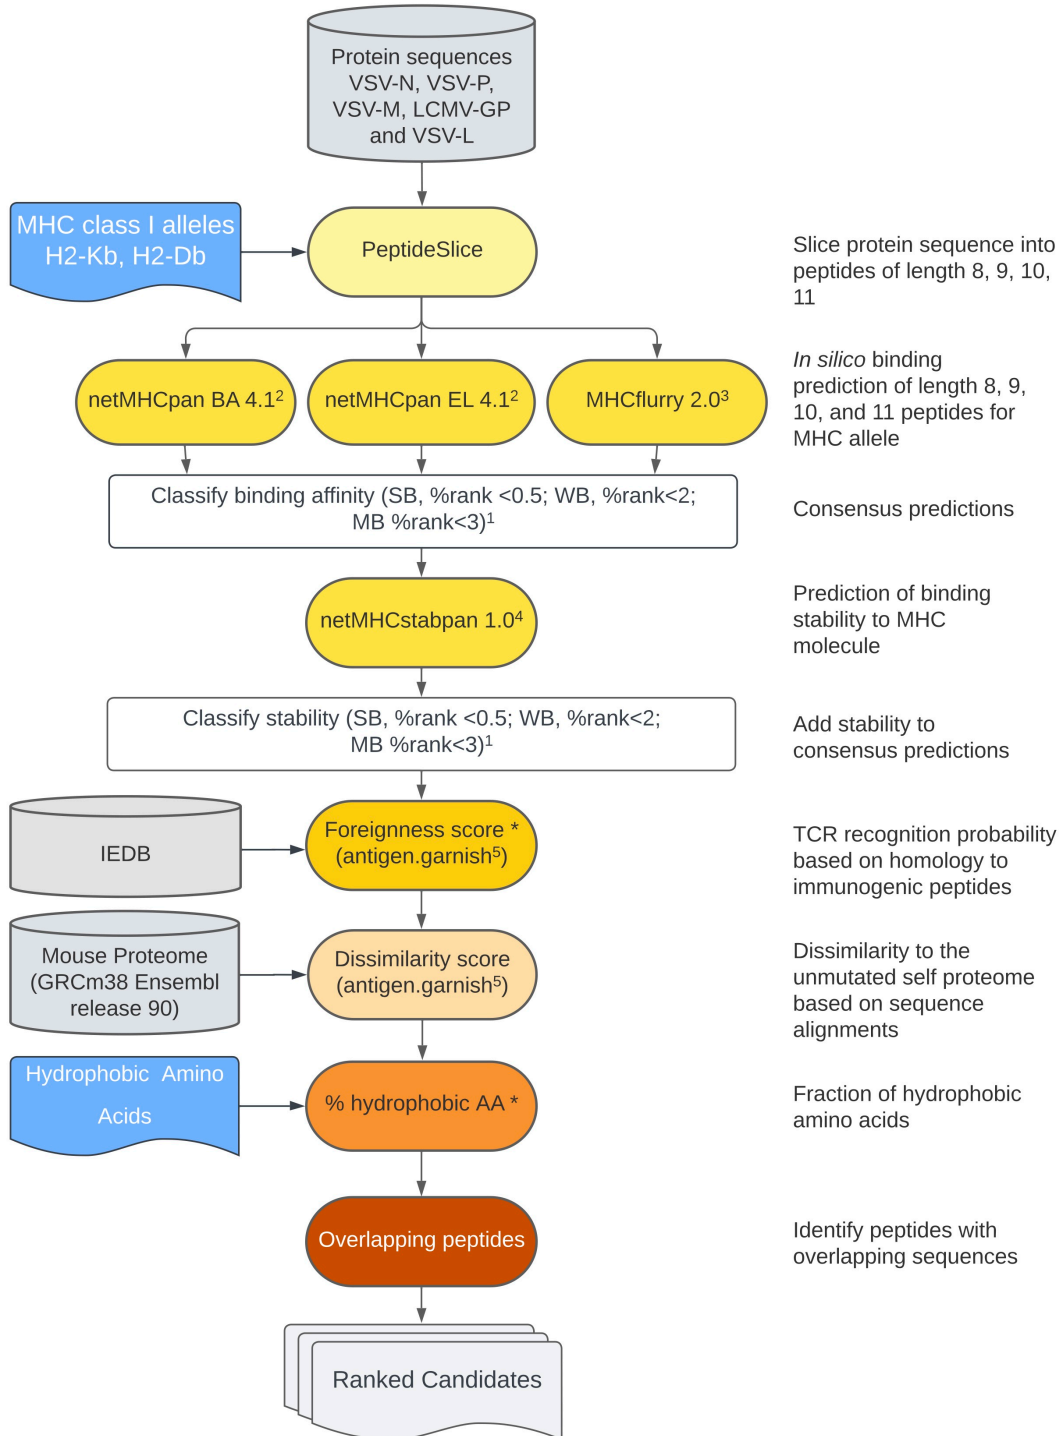

**Supplementary Figure 1: Workflow for ranking MHC class I epitopes from viral proteins.** The amino acid sequences of the viral proteins VSV-N, VSV-P, VSV-M, LCMV-GP and VSV-L were cut into peptides of length 8-11 using a sliding window approach. Epitope binding predictions were performed using the algorithms netMHCpan 4.1 (based on different data basis/method for binding affinity (BA) and eluted ligands (EL)) as well as MHCflurry 2.0 for the MHC alleles of interest. Predicted MHC class I binding epitopes were ranked by the consensus results of the three methods, which categorized them as strong binders (SB, %rank < 0.5), weak binders (WB, %rank < 2) or marginal binders (MB, %rank < 3), respectively. Peptides with similar ranking were further prioritized by binding stability of the peptide-MHC complex predicted with netMHCstabpan and dissimilarity to the unmutated mouse proteome by sequence alignments using the R package antigen.garnish. If applicable, the final candidate lists for each viral protein and each MHC class I allele were limited to a maximum of three peptides with an overlapping sequence of more than six amino acids.

<sup>1</sup> Strong binder (SB); weak binder (WB); marginal binder (MB).

<sup>2</sup> Reynisson B, Alvarez B, Paul S, Peters B, Nielsen M. NetMHCpan-4.1 and NetMHCIIpan-4.0: Improved predictions of MHC antigen presentation by concurrent motif deconvolution and integration of MS MHC eluted ligand data. *Nucleic Acids Res* (2020) 48:W449–W454.

<sup>3</sup> O'Donnell TJ, Rubinsteyn A, Laserson U. MHCflurry 2.0: Improved Pan-Allele Prediction of MHC Class I-Presented Peptides by Incorporating Antigen Processing. *Cell Syst* (2020) 11:42–48.

<sup>4</sup> Rasmussen M, Fenoy E, Harndahl M, Kristensen AB, Nielsen IK, Nielsen M, Buus S. Pan-Specific Prediction of Peptide–MHC Class I Complex Stability, a Correlate of T Cell Immunogenicity. *J Immunol* (2016) 197:1517–1524.

<sup>5</sup> Richman LP, Vonderheide RH, Rech AJ. Neoantigen Dissimilarity to the Self-Proteome Predicts Immunogenicity and Response to Immune Checkpoint Blockade. *Cell Syst* (2019) 9:375-382.e4.

\* The percentage of hydrophobic amino acids and the foreignness score were computed but were not used for epitope ranking.

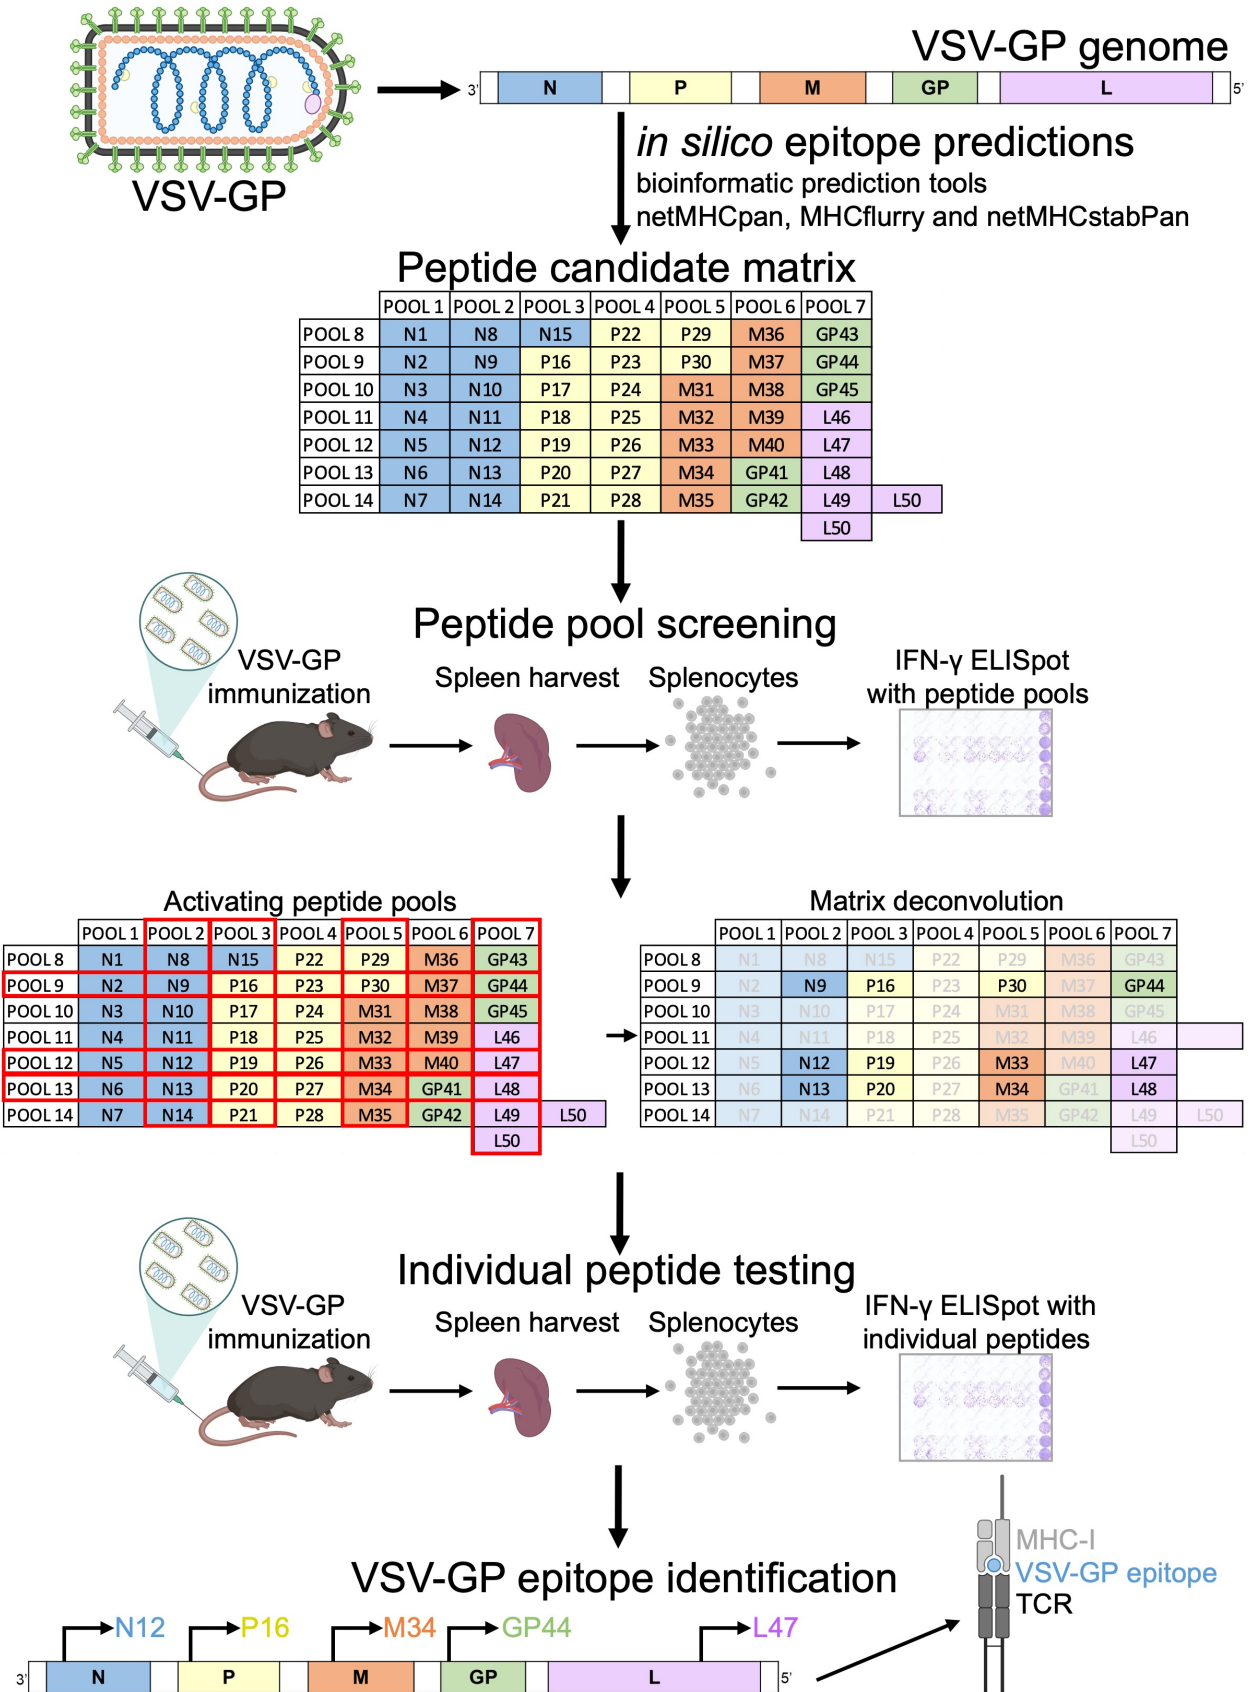

**Supplementary Figure 2: Overview of methodology.** Based on the amino acid (AA) sequences of the viral proteins in silico epitope predictions were performed. Due to the decreasing viral protein expression, a decreasing number of candidate epitopes were included in the peptide candidate matrix. In this exemplary matrix, the same predicted epitope was included in both a horizontal and a vertical pool (e.g. N3 was included in pools 1 and 10). The peptides of the predicted epitopes were synthesized and subsequently the peptide pools were screened using splenocytes of VSV-GP immunized mice in an IFN- $\gamma$  ELISpot. The significantly activating peptide pools were used to perform matrix deconvolution, for the selection of the individual peptide candidates. These were tested using splenocytes of VSV-GP immunized mice in an IFN- $\gamma$  ELISpot, to identify the VSV-GP T cell epitopes that are presented by MHC-I and recognized by anti-viral T cells with their TCR.

**A**

|         | POOL 1   | POOL 2    | POOL 3    | POOL 4    | POOL 5    | POOL 6     | POOL 7     |           |
|---------|----------|-----------|-----------|-----------|-----------|------------|------------|-----------|
| POOL 8  | H2-Db-N1 | H2-Db-N8  | H2-Db-N15 | H2-Db-P22 | H2-Db-P29 | H2-Db-M36  | H2-Db-GP43 |           |
| POOL 9  | H2-Db-N2 | H2-Db-N9  | H2-Db-P16 | H2-Db-P23 | H2-Db-P30 | H2-Db-M37  | H2-Db-GP44 |           |
| POOL 10 | H2-Db-N3 | H2-Db-N10 | H2-Db-P17 | H2-Db-P24 | H2-Db-M31 | H2-Db-M38  | H2-Db-GP45 |           |
| POOL 11 | H2-Db-N4 | H2-Db-N11 | H2-Db-P18 | H2-Db-P25 | H2-Db-M32 | H2-Db-M39  | H2-Db-L46  |           |
| POOL 12 | H2-Db-N5 | H2-Db-N12 | H2-Db-P19 | H2-Db-P26 | H2-Db-M33 | H2-Db-M40  | H2-Db-L47  |           |
| POOL 13 | H2-Db-N6 | H2-Db-N13 | H2-Db-P20 | H2-Db-P27 | H2-Db-M34 | H2-Db-GP41 | H2-Db-L48  |           |
| POOL 14 | H2-Db-N7 | H2-Db-N14 | H2-Db-P21 | H2-Db-P28 | H2-Db-M35 | H2-Db-GP42 | H2-Db-L49  | H2-Db-L50 |
|         |          |           |           |           |           |            | H2-Db-L50  |           |

**B**

|         | POOL 1   | POOL 2    | POOL 3    | POOL 4    | POOL 5    | POOL 6     | POOL 7     |           |
|---------|----------|-----------|-----------|-----------|-----------|------------|------------|-----------|
| POOL 8  | H2-Kb-N1 | H2-Kb-N8  | H2-Kb-N15 | H2-Kb-P22 | H2-Kb-P29 | H2-Kb-M36  | H2-Kb-GP43 |           |
| POOL 9  | H2-Kb-N2 | H2-Kb-N9  | H2-Kb-P16 | H2-Kb-P23 | H2-Kb-P30 | H2-Kb-M37  | H2-Kb-GP44 |           |
| POOL 10 | H2-Kb-N3 | H2-Kb-N10 | H2-Kb-P17 | H2-Kb-P24 | H2-Kb-M31 | H2-Kb-M38  | H2-Kb-GP45 |           |
| POOL 11 | H2-Kb-N4 | H2-Kb-N11 | H2-Kb-P18 | H2-Kb-P25 | H2-Kb-M32 | H2-Kb-M39  | H2-Kb-L46  |           |
| POOL 12 | H2-Kb-N5 | H2-Kb-N12 | H2-Kb-P19 | H2-Kb-P26 | H2-Kb-M33 | H2-Kb-M40  | H2-Kb-L47  |           |
| POOL 13 | H2-Kb-N6 | H2-Kb-N13 | H2-Kb-P20 | H2-Kb-P27 | H2-Kb-M34 | H2-Kb-GP41 | H2-Kb-L48  |           |
| POOL 14 | H2-Kb-N7 | H2-Kb-N14 | H2-Kb-P21 | H2-Kb-P28 | H2-Kb-M35 | H2-Kb-GP42 | H2-Kb-L49  | H2-Kb-L50 |
|         |          |           |           |           |           |            | H2-Kb-L50  |           |

**Supplementary Figure 3: H2-Db and H2-Kb matrix deconvolution to identify individual peptide candidates. A-B)** Based on the peptide pool screening, non-significant peptide pools were crossed out (indicated by grey text and fainter colors), thereby identifying the individual H2-Db peptide candidates (A) and individual H2-Kb peptide candidates (B).

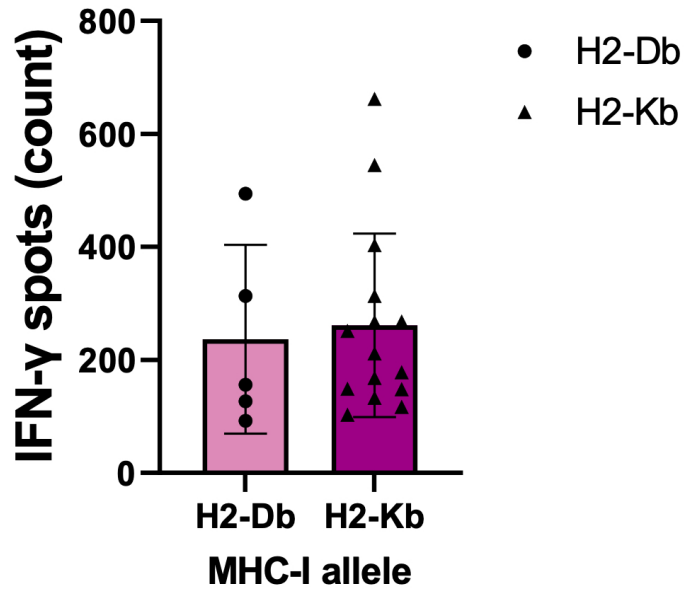

**Supplementary Figure 4: VSV-GP T cell epitopes presented by MHC-I alleles H2-Db and H2-Kb.** Average number of IFN- $\gamma$  spots of each VSV-GP T cell epitope per MHC-I allele. No statistically significant difference in mean number of IFN- $\gamma$  spots was detected between H2-Db and H2-Kb (Mann-Whitney U test;  $p=0.62$ ).

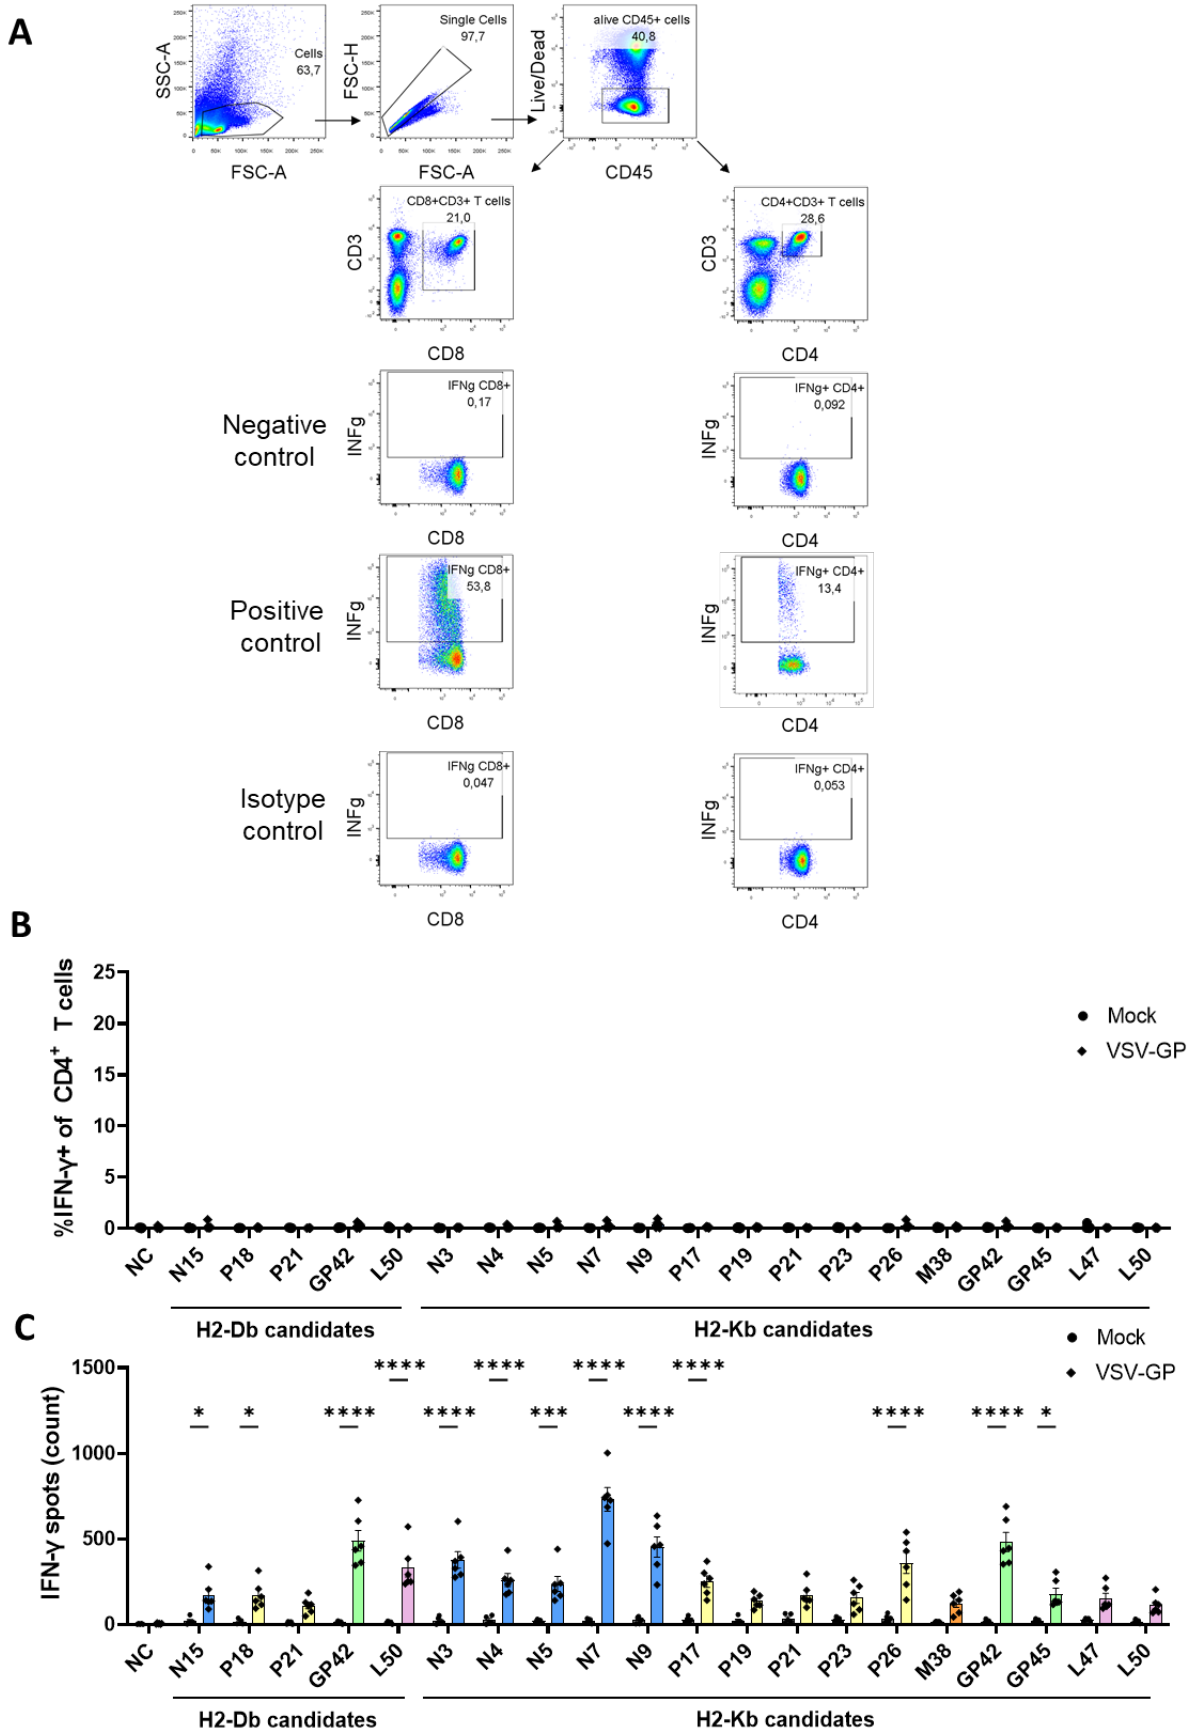

**Supplementary Figure 5: Intracellular cytokine staining and corresponding ELISpots using VSV-GP T cell epitopes.** **A)** gating strategy and representative plots of negative control, positive control (PHA/ionomycin) and isotype control staining. **B)** Frequencies of IFN- $\gamma^+$  CD4 $^+$  T cells of splenocytes from mock or VSV-GP treated mice upon stimulation with individual peptides (10  $\mu$ g/ml). **C)** Quantification of corresponding IFN- $\gamma$  ELISpots, which were performed as a control for each ICS experiment (n=6 for mock, n=6 for VSV-GP, from three independently performed experiments). Significant differences between mock and VSV-GP treatment are indicated with asterisks (tested using two-way ANOVA with Sidak's multiple comparison). \*  $p < 0.05$ ; \*\*\*  $p \leq 0.001$ ; \*\*\*\*  $p \leq 0.0001$ . Bar color represents from which viral protein the peptide is derived.



## 1.2 Supplementary Tables

**Supplementary Table 1: VSV-GP T cell epitopes presented by H2-Db.** The peptide name, average IFN- $\gamma$  spot count, peptide sequence and peptide length are indicated for the significant epitopes from Figure 3.

| Peptide    | Average IFN- $\gamma$ spot count<br>VSV-GP treated mice | Peptide sequence | Peptide length |
|------------|---------------------------------------------------------|------------------|----------------|
| H2-Db-N15  | 127                                                     | RAVMSLQGL        | 9              |
| H2-Db-P18  | 156                                                     | FQPKKASLQPL      | 11             |
| H2-Db-P21  | 92                                                      | RAEKSNYEL        | 9              |
| H2-Db-GP42 | 494                                                     | KAVYNFATC        | 9              |
| H2-Db-L50  | 313                                                     | FSLLNLYRI        | 9              |

**Supplementary Table 2: VSV-GP T cell epitopes presented by H2-Kb.** The peptide name, average IFN- $\gamma$  spot count, peptide sequence, peptide length and overlapping motif are indicated for the significant epitopes from Figure 4.

| Peptide    | Average IFN- $\gamma$ spot count<br>VSV-GP treated mice | Peptide sequence | Peptide length | Overlapping motif |
|------------|---------------------------------------------------------|------------------|----------------|-------------------|
| H2-Kb-N3   | 403                                                     | NSYLYGAL         | 8              | NSYLYGAL          |
| H2-Kb-N4   | 313                                                     | VNSYLYGAL        | 9              | NSYLYGAL          |
| H2-Kb-N5   | 268                                                     | ALATFGHL         | 8              | -                 |
| H2-Kb-N7   | 662                                                     | RGYVYQGL         | 8              | -                 |
| H2-Kb-N9   | 267                                                     | PAFHFWGQL        | 9              | -                 |
| H2-Kb-P17  | 251                                                     | LGLRYKKL         | 8              | KL                |
| H2-Kb-P19  | 117                                                     | YLKSYSRL         | 8              | -                 |
| H2-Kb-P21  | 178                                                     | VQSAKYWNL        | 9              | -                 |
| H2-Kb-P23  | 133                                                     | KLYNQARV         | 8              | KL                |
| H2-Kb-P26  | 211                                                     | SNYELFQEDGV      | 11             | -                 |
| H2-Kb-M38  | 148                                                     | AAPMIWDHF        | 9              | -                 |
| H2-Kb-GP42 | 545                                                     | AVYNFATC         | 8              | -                 |
| H2-Kb-GP45 | 168                                                     | LNHNFCL          | 8              | -                 |
| H2-Kb-L47  | 149                                                     | LIRKFNSL         | 8              | -                 |
| H2-Kb-L50  | 103                                                     | LAGRFFSL         | 8              | -                 |
